# Supplementary material for: Two Novel Tyrosinase Inhibitory Sesquiterpenes Induced by CuCl2 from a Marine-Derived Fungus Pestalotiopsis sp. Z233
Source: MDPI journal article supplement (doi:10.3390/md11082713), 2013-08-02
Supplement: s1 [file s1]

marinedrugs-11-02713-s001.mol
  corina  04141402253D 1   1.00000     0.00000 
CORINA 3.49 0023  12.04.2013
 42 44  0  0  0  0  0  0  0  0999 V2000
   -0.8599    1.5335    0.6683 C   0  0  0  0  0  0  0  0  0  0  0  0
   -0.7310    0.1489    0.5431 C   0  0  0  0  0  0  0  0  0  0  0  0
    0.5389   -0.4199    0.4263 C   0  0  0  0  0  0  0  0  0  0  0  0
    1.6567    0.3883    0.4353 C   0  0  0  0  0  0  0  0  0  0  0  0
    1.5217    1.7597    0.5598 C   0  0  0  0  0  0  0  0  0  0  0  0
    0.2663    2.3300    0.6759 C   0  0  0  0  0  0  0  0  0  0  0  0
   -1.9325   -0.7104    0.5346 C   0  0  0  0  0  0  0  0  0  0  0  0
   -1.8046   -2.0460    0.4136 O   0  0  0  0  0  0  0  0  0  0  0  0
   -3.0281   -2.8280    0.4130 C   0  0  0  0  0  0  0  0  0  0  0  0
   -3.3727   -3.2201    1.8443 C   0  0  0  0  0  0  0  0  0  0  0  0
   -2.8314   -4.0696   -0.4605 C   0  0  0  0  0  0  0  0  0  0  0  0
   -2.2858   -5.2259    0.3715 C   0  0  0  0  0  0  0  0  0  0  0  0
   -3.3218   -5.6775    1.4040 C   0  0  0  0  0  0  0  0  0  0  0  0
   -4.1918   -4.5081    1.8477 C   0  0  0  0  0  0  0  0  0  0  0  0
   -1.8446   -3.7036   -1.5745 C   0  0  0  0  0  0  0  0  0  0  0  0
   -1.5768   -4.9161   -2.4640 C   0  0  0  0  0  0  0  0  0  0  0  0
   -0.9669   -6.0303   -1.6081 C   0  0  0  0  0  0  0  0  0  0  0  0
   -1.9715   -6.4264   -0.5278 C   0  0  0  0  0  0  0  0  0  0  0  0
   -3.0359   -0.2128    0.6368 O   0  0  0  0  0  0  0  0  0  0  0  0
   -4.1706   -4.4745   -1.0797 C   0  0  0  0  0  0  0  0  0  0  0  0
   -4.7595   -3.3295   -1.7507 O   0  0  0  0  0  0  0  0  0  0  0  0
   -5.9455   -3.5181   -2.3503 C   0  0  0  0  0  0  0  0  0  0  0  0
   -6.6179   -2.3754   -3.0667 C   0  0  0  0  0  0  0  0  0  0  0  0
   -6.4741   -4.6041   -2.3157 O   0  0  0  0  0  0  0  0  0  0  0  0
   -2.4035   -2.6315   -2.3786 O   0  0  0  0  0  0  0  0  0  0  0  0
   -1.5351   -1.7844   -2.9532 C   0  0  0  0  0  0  0  0  0  0  0  0
   -2.0416   -0.6471   -3.8023 C   0  0  0  0  0  0  0  0  0  0  0  0
   -0.3473   -1.9339   -2.7897 O   0  0  0  0  0  0  0  0  0  0  0  0
   -2.8044   -5.3700   -3.0375 O   0  0  0  0  0  0  0  0  0  0  0  0
   -3.2614   -6.9146   -1.1901 C   0  0  0  0  0  0  0  0  0  0  0  0
   -1.0757   -4.8027    1.0534 O   0  0  0  0  0  0  0  0  0  0  0  0
   -2.6359   -6.2276    2.5595 O   0  0  0  0  0  0  0  0  0  0  0  0
   -0.3826   -5.7479    1.7076 C   0  0  0  0  0  0  0  0  0  0  0  0
    0.8062   -5.3631    2.5501 C   0  0  0  0  0  0  0  0  0  0  0  0
   -2.8435   -7.5258    2.8305 C   0  0  0  0  0  0  0  0  0  0  0  0
   -2.2645   -8.1365    4.0806 C   0  0  0  0  0  0  0  0  0  0  0  0
   -0.7117   -6.9072    1.6210 O   0  0  0  0  0  0  0  0  0  0  0  0
   -3.4947   -8.2046    2.0722 O   0  0  0  0  0  0  0  0  0  0  0  0
   -4.7168   -4.7726    3.2602 C   0  0  0  0  0  0  0  0  0  0  0  0
   -5.5590   -3.5819    3.7226 C   0  0  0  0  0  0  0  0  0  0  0  0
   -5.5795   -6.0363    3.2553 C   0  0  0  0  0  0  0  0  0  0  0  0
   -3.6149   -4.9516    4.1523 O   0  0  0  0  0  0  0  0  0  0  0  0
  1  2  1  0      
  2  3  2  0      
  3  4  1  0      
  4  5  2  0      
  5  6  1  0      
  6  1  2  0      
  2  7  1  0      
  7  8  1  0      
  9  8  1  0      
  9 10  1  0      
  9 11  1  0      
 11 12  1  0      
 12 13  1  0      
 13 14  1  0      
 14 10  1  0      
 11 15  1  0      
 15 16  1  0      
 16 17  1  0      
 17 18  1  0      
 18 12  1  0      
  7 19  2  0      
 11 20  1  0      
 20 21  1  0      
 21 22  1  0      
 22 23  1  0      
 22 24  2  0      
 15 25  1  0      
 25 26  1  0      
 26 27  1  0      
 26 28  2  0      
 16 29  1  0      
 18 30  1  0      
 12 31  1  0      
 13 32  1  0      
 31 33  1  0      
 33 34  1  0      
 32 35  1  0      
 35 36  1  0      
 33 37  2  0      
 35 38  2  0      
 14 39  1  0      
 39 40  1  0      
 39 41  1  0      
 39 42  1  0      
M  END
$$$$
