# Supplementary material for: Two Novel Tyrosinase Inhibitory Sesquiterpenes Induced by CuCl2 from a Marine-Derived Fungus Pestalotiopsis sp. Z233
Source: MDPI journal article supplement (doi:10.3390/md11082713), 2013-08-02
Supplement: s2 [file s2]

marinedrugs-11-02713-s001.mol
  ChemDraw12271311352D

 42 44  0  0  0  0  0  0  0  0999 V2000
    1.6080    2.9552    0.0000 C   0  0  0  0  0  0  0  0  0  0  0  0
    1.6080    2.1302    0.0000 C   0  0  0  0  0  0  0  0  0  0  0  0
    2.3225    1.7177    0.0000 C   0  0  0  0  0  0  0  0  0  0  0  0
    3.0369    2.1302    0.0000 C   0  0  0  0  0  0  0  0  0  0  0  0
    3.0369    2.9552    0.0000 C   0  0  0  0  0  0  0  0  0  0  0  0
    2.3225    3.3677    0.0000 C   0  0  0  0  0  0  0  0  0  0  0  0
    0.8935    1.7177    0.0000 C   0  0  0  0  0  0  0  0  0  0  0  0
    0.8935    0.8927    0.0000 O   0  0  0  0  0  0  0  0  0  0  0  0
    0.3837    0.2740    0.0000 C   0  0  0  0  0  0  0  0  0  0  0  0
    1.0982   -0.1385    0.0000 C   0  0  0  0  0  0  0  0  0  0  0  0
   -0.3307   -0.1385    0.0000 C   0  0  0  0  0  0  0  0  0  0  0  0
   -0.3307   -0.9635    0.0000 C   0  0  0  0  0  0  0  0  0  0  0  0
    0.3837   -1.3760    0.0000 C   0  0  0  0  0  0  0  0  0  0  0  0
    1.0982   -0.9635    0.0000 C   0  0  0  0  0  0  0  0  0  0  0  0
   -1.0452    0.2740    0.0000 C   0  0  0  0  0  0  0  0  0  0  0  0
   -1.7597   -0.1385    0.0000 C   0  0  0  0  0  0  0  0  0  0  0  0
   -1.7597   -0.9635    0.0000 C   0  0  0  0  0  0  0  0  0  0  0  0
   -1.0452   -1.3760    0.0000 C   0  0  0  0  0  0  0  0  0  0  0  0
    0.1791    2.1302    0.0000 O   0  0  0  0  0  0  0  0  0  0  0  0
   -0.3307    0.6865    0.0000 C   0  0  0  0  0  0  0  0  0  0  0  0
    0.2526    1.2699    0.0000 O   0  0  0  0  0  0  0  0  0  0  0  0
   -0.3307    1.8532    0.0000 C   0  0  0  0  0  0  0  0  0  0  0  0
   -0.3307    2.6782    0.0000 C   0  0  0  0  0  0  0  0  0  0  0  0
   -1.0452    1.4407    0.0000 O   0  0  0  0  0  0  0  0  0  0  0  0
   -1.6286    0.8574    0.0000 O   0  0  0  0  0  0  0  0  0  0  0  0
   -2.4536    0.8574    0.0000 C   0  0  0  0  0  0  0  0  0  0  0  0
   -2.8661    1.5718    0.0000 C   0  0  0  0  0  0  0  0  0  0  0  0
   -3.0369    0.2740    0.0000 O   0  0  0  0  0  0  0  0  0  0  0  0
   -2.5847   -0.1385    0.0000 O   0  0  0  0  0  0  0  0  0  0  0  0
   -1.0452   -2.2010    0.0000 C   0  0  0  0  0  0  0  0  0  0  0  0
   -0.3307   -1.7885    0.0000 O   0  0  0  0  0  0  0  0  0  0  0  0
    0.3837   -2.2010    0.0000 O   0  0  0  0  0  0  0  0  0  0  0  0
   -0.7432   -2.5030    0.0000 C   0  0  0  0  0  0  0  0  0  0  0  0
   -0.1599   -3.0863    0.0000 C   0  0  0  0  0  0  0  0  0  0  0  0
    0.9671   -2.7844    0.0000 C   0  0  0  0  0  0  0  0  0  0  0  0
    0.3837   -3.3677    0.0000 C   0  0  0  0  0  0  0  0  0  0  0  0
   -1.4577   -2.9155    0.0000 O   0  0  0  0  0  0  0  0  0  0  0  0
    1.7921   -2.7844    0.0000 O   0  0  0  0  0  0  0  0  0  0  0  0
    1.8127   -1.3760    0.0000 C   0  0  0  0  0  0  0  0  0  0  0  0
    2.5271   -0.9635    0.0000 C   0  0  0  0  0  0  0  0  0  0  0  0
    1.8127   -2.2010    0.0000 C   0  0  0  0  0  0  0  0  0  0  0  0
    2.5271   -1.7885    0.0000 O   0  0  0  0  0  0  0  0  0  0  0  0
  1  2  1  0      
  2  3  2  0      
  3  4  1  0      
  4  5  2  0      
  5  6  1  0      
  6  1  2  0      
  2  7  1  0      
  7  8  1  0      
  9  8  1  6      
  9 10  1  0      
  9 11  1  0      
 11 12  1  0      
 12 13  1  0      
 13 14  1  0      
 14 10  1  0      
 11 15  1  0      
 15 16  1  0      
 16 17  1  0      
 17 18  1  0      
 18 12  1  0      
  7 19  2  0      
 11 20  1  1      
 20 21  1  0      
 21 22  1  0      
 22 23  1  0      
 22 24  2  0      
 15 25  1  1      
 25 26  1  0      
 26 27  1  0      
 26 28  2  0      
 16 29  1  1      
 18 30  1  1      
 12 31  1  6      
 13 32  1  6      
 31 33  1  0      
 33 34  1  0      
 32 35  1  0      
 35 36  1  0      
 33 37  2  0      
 35 38  2  0      
 14 39  1  6      
 39 40  1  0      
 39 41  1  0      
 39 42  1  0      
M  END
