# Supplementary material for: Two Novel Tyrosinase Inhibitory Sesquiterpenes Induced by CuCl2 from a Marine-Derived Fungus Pestalotiopsis sp. Z233
Source: MDPI journal article supplement (doi:10.3390/md11082713), 2013-08-02
Supplement: s3 [file s3]

marinedrugs-11-02713-s002.mol
  corina  04141402333D 1   1.00000     0.00000 
CORINA 3.49 0023  12.04.2013
 36 38  0  0  0  0  0  0  0  0999 V2000
   -2.4645    1.1153    2.7491 C   0  0  0  0  0  0  0  0  0  0  0  0
   -1.9142   -0.0536    2.2198 C   0  0  0  0  0  0  0  0  0  0  0  0
   -0.5352   -0.1393    2.0179 C   0  0  0  0  0  0  0  0  0  0  0  0
    0.2739    0.9298    2.3422 C   0  0  0  0  0  0  0  0  0  0  0  0
   -0.2781    2.0852    2.8664 C   0  0  0  0  0  0  0  0  0  0  0  0
   -1.6438    2.1769    3.0690 C   0  0  0  0  0  0  0  0  0  0  0  0
   -2.7868   -1.1947    1.8753 C   0  0  0  0  0  0  0  0  0  0  0  0
   -2.2526   -2.3211    1.3648 O   0  0  0  0  0  0  0  0  0  0  0  0
   -3.1699   -3.4017    1.0497 C   0  0  0  0  0  0  0  0  0  0  0  0
   -3.3239   -4.3001    2.2705 C   0  0  0  0  0  0  0  0  0  0  0  0
   -2.6264   -4.1913   -0.1437 C   0  0  0  0  0  0  0  0  0  0  0  0
   -1.7178   -5.3202    0.3330 C   0  0  0  0  0  0  0  0  0  0  0  0
   -2.5238   -6.3625    1.1124 C   0  0  0  0  0  0  0  0  0  0  0  0
   -3.6991   -5.7132    1.8322 C   0  0  0  0  0  0  0  0  0  0  0  0
   -1.8435   -3.2163   -1.0296 C   0  0  0  0  0  0  0  0  0  0  0  0
   -1.2421   -3.9529   -2.2250 C   0  0  0  0  0  0  0  0  0  0  0  0
   -0.2849   -5.0314   -1.7087 C   0  0  0  0  0  0  0  0  0  0  0  0
   -1.0765   -6.0288   -0.8651 C   0  0  0  0  0  0  0  0  0  0  0  0
   -3.9860   -1.1174    2.0524 O   0  0  0  0  0  0  0  0  0  0  0  0
   -3.7933   -4.7782   -0.9406 C   0  0  0  0  0  0  0  0  0  0  0  0
   -4.7312   -3.7436   -1.2436 O   0  0  0  0  0  0  0  0  0  0  0  0
   -2.7232   -2.1924   -1.4986 O   0  0  0  0  0  0  0  0  0  0  0  0
   -2.2861   -4.5636   -2.9860 O   0  0  0  0  0  0  0  0  0  0  0  0
   -2.1722   -6.6622   -1.7249 C   0  0  0  0  0  0  0  0  0  0  0  0
   -0.6771   -4.7759    1.1867 O   0  0  0  0  0  0  0  0  0  0  0  0
   -4.0648   -6.5464    3.0622 C   0  0  0  0  0  0  0  0  0  0  0  0
   -5.2450   -5.8958    3.7864 C   0  0  0  0  0  0  0  0  0  0  0  0
   -4.4521   -7.9601    2.6237 C   0  0  0  0  0  0  0  0  0  0  0  0
   -2.9423   -6.6120    3.9441 O   0  0  0  0  0  0  0  0  0  0  0  0
    0.1613   -5.6532    1.7604 C   0  0  0  0  0  0  0  0  0  0  0  0
    1.3492   -5.1582    2.5445 C   0  0  0  0  0  0  0  0  0  0  0  0
   -0.0364   -6.8399    1.6480 O   0  0  0  0  0  0  0  0  0  0  0  0
   -0.1837   -7.0691   -0.3868 O   0  0  0  0  0  0  0  0  0  0  0  0
    0.4502   -7.8025   -1.3153 C   0  0  0  0  0  0  0  0  0  0  0  0
    1.3927   -8.9003   -0.8940 C   0  0  0  0  0  0  0  0  0  0  0  0
    0.2652   -7.5824   -2.4888 O   0  0  0  0  0  0  0  0  0  0  0  0
  1  2  1  0      
  2  3  2  0      
  3  4  1  0      
  4  5  2  0      
  5  6  1  0      
  6  1  2  0      
  2  7  1  0      
  7  8  1  0      
  9  8  1  0      
  9 10  1  0      
  9 11  1  0      
 11 12  1  0      
 12 13  1  0      
 13 14  1  0      
 14 10  1  0      
 11 15  1  0      
 15 16  1  0      
 16 17  1  0      
 17 18  1  0      
 18 12  1  0      
  7 19  2  0      
 11 20  1  0      
 20 21  1  0      
 15 22  1  0      
 16 23  1  0      
 18 24  1  0      
 12 25  1  0      
 14 26  1  0      
 26 27  1  0      
 26 28  1  0      
 26 29  1  0      
 25 30  1  0      
 30 31  1  0      
 30 32  2  0      
 33 34  1  0      
 34 35  1  0      
 34 36  2  0      
 18 33  1  0      
M  END
$$$$
