# Supplementary material for: Two Novel Tyrosinase Inhibitory Sesquiterpenes Induced by CuCl2 from a Marine-Derived Fungus Pestalotiopsis sp. Z233
Source: MDPI journal article supplement (doi:10.3390/md11082713), 2013-08-02
Supplement: s4 [file s4]

marinedrugs-11-02713-s002.mol
  ChemDraw04141414302D

 36 38  0  0  0  0  0  0  0  0999 V2000
    1.7428    2.7490    0.0000 C   0  0  0  0  0  0  0  0  0  0  0  0
    1.7428    1.9240    0.0000 C   0  0  0  0  0  0  0  0  0  0  0  0
    2.4573    1.5115    0.0000 C   0  0  0  0  0  0  0  0  0  0  0  0
    3.1718    1.9240    0.0000 C   0  0  0  0  0  0  0  0  0  0  0  0
    3.1718    2.7490    0.0000 C   0  0  0  0  0  0  0  0  0  0  0  0
    2.4573    3.1615    0.0000 C   0  0  0  0  0  0  0  0  0  0  0  0
    1.0283    1.5115    0.0000 C   0  0  0  0  0  0  0  0  0  0  0  0
    1.0283    0.6865    0.0000 O   0  0  0  0  0  0  0  0  0  0  0  0
    0.5185    0.0677    0.0000 C   0  0  0  0  0  0  0  0  0  0  0  0
    1.2330   -0.3448    0.0000 C   0  0  0  0  0  0  0  0  0  0  0  0
   -0.1959   -0.3448    0.0000 C   0  0  0  0  0  0  0  0  0  0  0  0
   -0.1959   -1.1698    0.0000 C   0  0  0  0  0  0  0  0  0  0  0  0
    0.5185   -1.5823    0.0000 C   0  0  0  0  0  0  0  0  0  0  0  0
    1.2330   -1.1698    0.0000 C   0  0  0  0  0  0  0  0  0  0  0  0
   -0.9104    0.0677    0.0000 C   0  0  0  0  0  0  0  0  0  0  0  0
   -1.6249   -0.3448    0.0000 C   0  0  0  0  0  0  0  0  0  0  0  0
   -1.6249   -1.1698    0.0000 C   0  0  0  0  0  0  0  0  0  0  0  0
   -0.9104   -1.5823    0.0000 C   0  0  0  0  0  0  0  0  0  0  0  0
    0.3139    1.9240    0.0000 O   0  0  0  0  0  0  0  0  0  0  0  0
   -0.1959    0.4802    0.0000 C   0  0  0  0  0  0  0  0  0  0  0  0
    0.3874    1.0636    0.0000 O   0  0  0  0  0  0  0  0  0  0  0  0
   -1.4938    0.6511    0.0000 O   0  0  0  0  0  0  0  0  0  0  0  0
   -2.4499   -0.3448    0.0000 O   0  0  0  0  0  0  0  0  0  0  0  0
   -0.9104   -2.4073    0.0000 C   0  0  0  0  0  0  0  0  0  0  0  0
   -0.1959   -1.9948    0.0000 O   0  0  0  0  0  0  0  0  0  0  0  0
    1.9475   -1.5823    0.0000 C   0  0  0  0  0  0  0  0  0  0  0  0
    2.6619   -1.1698    0.0000 C   0  0  0  0  0  0  0  0  0  0  0  0
    1.9475   -2.4073    0.0000 C   0  0  0  0  0  0  0  0  0  0  0  0
    2.6619   -1.9948    0.0000 O   0  0  0  0  0  0  0  0  0  0  0  0
    0.3874   -2.5781    0.0000 C   0  0  0  0  0  0  0  0  0  0  0  0
   -0.1959   -3.1615    0.0000 C   0  0  0  0  0  0  0  0  0  0  0  0
    1.2124   -2.5781    0.0000 O   0  0  0  0  0  0  0  0  0  0  0  0
   -1.7428   -2.1185    0.0000 O   0  0  0  0  0  0  0  0  0  0  0  0
   -2.4573   -1.7060    0.0000 C   0  0  0  0  0  0  0  0  0  0  0  0
   -3.1718   -2.1185    0.0000 C   0  0  0  0  0  0  0  0  0  0  0  0
   -2.4573   -0.8810    0.0000 O   0  0  0  0  0  0  0  0  0  0  0  0
  1  2  1  0      
  2  3  2  0      
  3  4  1  0      
  4  5  2  0      
  5  6  1  0      
  6  1  2  0      
  2  7  1  0      
  7  8  1  0      
  9  8  1  6      
  9 10  1  0      
  9 11  1  0      
 11 12  1  0      
 12 13  1  0      
 13 14  1  0      
 14 10  1  0      
 11 15  1  0      
 15 16  1  0      
 16 17  1  0      
 17 18  1  0      
 18 12  1  0      
  7 19  2  0      
 11 20  1  1      
 20 21  1  0      
 15 22  1  1      
 16 23  1  1      
 18 24  1  1      
 12 25  1  6      
 14 26  1  6      
 26 27  1  0      
 26 28  1  0      
 26 29  1  0      
 25 30  1  0      
 30 31  1  0      
 30 32  2  0      
 33 34  1  0      
 34 35  1  0      
 34 36  2  0      
 18 33  1  0      
M  END
